# Supplementary material for: Smart Soup, a Traditional Chinese Medicine Formula, Ameliorates Amyloid Pathology and Related Cognitive Deficits
Source: PubMed Central journal article supplement (PMC4227681; doi:10.1371/journal.pone.0111215), 2014-11-11
Supplement: pone.0111215.s010.pdf [file pone.0111215.s010.pdf]

**Table S1. Herbal Ingredients in the SS.**

| Pharmaceutical Name          | Latin Name                           | English Name                      | Traditional Usage (for)                                                                                                                                                                                                                                       | Recent Studies                                                                                                                                                                                            |
|------------------------------|--------------------------------------|-----------------------------------|---------------------------------------------------------------------------------------------------------------------------------------------------------------------------------------------------------------------------------------------------------------|-----------------------------------------------------------------------------------------------------------------------------------------------------------------------------------------------------------|
| Rhizoma Acori<br>Tatarinowii | <i>Acorus tatarinowii</i><br>Schott. | Grassleaf<br>Sweetflag<br>Rhizome | <ul style="list-style-type: none"><li>• Chronic gastritis, feeling of oppression</li><li>• Delirium, deafness, tinnitus</li><li>• Rheumatic arthritis, lumbago</li></ul>                                                                                      | <ul style="list-style-type: none"><li>• Show neuroprotective effects against excitotoxic neural death</li><li>• Attenuate learning and memory deficits [7]</li></ul>                                      |
| Poria cum Radix Pini         | <i>Poria cocos</i> (Schw.)<br>Wolf   | Tuckhoe with<br>pine              | <ul style="list-style-type: none"><li>• Edema, dysuria</li><li>• Palpitation, insomnia</li></ul>                                                                                                                                                              | <ul style="list-style-type: none"><li>• Possess sedative activity [8]</li></ul>                                                                                                                           |
| Radix Polygalae              | <i>Polygala tenuifolia</i><br>Willd. | Thinleaf<br>Milkwort Root         | <ul style="list-style-type: none"><li>• Irritability, apprehension, palpitation, insomnia, excessive dreams</li><li>• Convulsion, insanity</li><li>• Productive cough with thick sputum</li><li>• Skin infection, acute mastitis and breast nodules</li></ul> | <ul style="list-style-type: none"><li>• Show neuroprotective effects [10,11]</li><li>• Enhance cognitive functions in elderly individuals and show memory enhancement in healthy adults [12,13]</li></ul> |
