# Supplementary material for: Smart Soup, a Traditional Chinese Medicine Formula, Ameliorates Amyloid Pathology and Related Cognitive Deficits
Source: PubMed Central journal article supplement (PMC4227681; doi:10.1371/journal.pone.0111215), 2014-11-11
Supplement: pone.0111215.s011.pdf [file pone.0111215.s011.pdf]

**Table S2. Compounds identified in SS by HPLC-TOF/MS.**

| No | t <sub>R</sub><br>(min) | Molecular<br>formula                             | Ion mode            | Mass (m/z)        |                     |                | Identification                                               | Source <sup>a</sup> |
|----|-------------------------|--------------------------------------------------|---------------------|-------------------|---------------------|----------------|--------------------------------------------------------------|---------------------|
|    |                         |                                                  |                     | Measured<br>(m/z) | Calculated<br>(m/z) | Error<br>(ppm) |                                                              |                     |
| 1  | 10.985                  | C <sub>23</sub> H <sub>32</sub> O <sub>15</sub>  | [M-H] <sup>-</sup>  | 547.1687          | 547.1668            | 3.47           | Sibiricose A1                                                | RP                  |
| 2  | 16.246                  | C <sub>24</sub> H <sub>26</sub> O <sub>14</sub>  | [M-H] <sup>-</sup>  | 537.1223          | 537.125             | -5.03          | Sibircaxanthone A                                            | RP                  |
| 3  | 17.399                  | C <sub>25</sub> H <sub>28</sub> O <sub>15</sub>  | [M-H] <sup>-</sup>  | 567.138           | 567.1355            | 4.41           | Polygalaxanthone III                                         | RP                  |
| 4  | 20.037                  | C <sub>30</sub> H <sub>36</sub> O <sub>17</sub>  | [M-H] <sup>-</sup>  | 667.1686          | 667.188             | 0.89           | Tenuifoliside B                                              | RP                  |
| 5  | 21.911                  | C <sub>12</sub> H <sub>16</sub> O <sub>4</sub>   | [M+H] <sup>+</sup>  | 225.1126          | 225.1121            | 2.22           | Acoramone                                                    | AT                  |
| 6  | 22.476                  | C <sub>26</sub> H <sub>30</sub> O <sub>15</sub>  | [M-H] <sup>-</sup>  | 581.1558          | 581.1512            | 7.92           | Polygalaxanthone V                                           | RP                  |
| 7  | 22.893                  | C <sub>27</sub> H <sub>32</sub> O <sub>16</sub>  | [M-H] <sup>-</sup>  | 611.1588          | 611.1618            | -4.91          | Polygalaxanthone VII                                         | RP                  |
| 8  | 23.519                  | C <sub>34</sub> H <sub>42</sub> O <sub>19</sub>  | [M-H] <sup>-</sup>  | 753.225           | 753.2248            | 0.26           | 3, 6'-disinapoyl sucrose (DSS)                               | RP                  |
| 9  | 24.363                  | C <sub>33</sub> H <sub>40</sub> O <sub>18</sub>  | [M-H] <sup>-</sup>  | 723.2136          | 723.2142            | -0.83          | Sucrose 10                                                   | RP                  |
| 10 | 26.668                  | C <sub>30</sub> H <sub>36</sub> O <sub>16</sub>  | [M-H] <sup>-</sup>  | 651.1942          | 651.1931            | 1.69           | Sucrose 8                                                    | RP                  |
| 11 | 26.752                  | C <sub>30</sub> H <sub>36</sub> O <sub>16</sub>  | [M-H] <sup>-</sup>  | 651.1951          | 651.1931            | 3.07           | 3'-sinapoyl-6-benzoyl sucrose                                | RP                  |
| 12 | 27.536                  | C <sub>66</sub> H <sub>84</sub> O <sub>38</sub>  | [M-H] <sup>-</sup>  | 1483.459          | 1483.457            | 1.34           | Tenuifoliose G                                               | RP                  |
| 13 | 27.804                  | C <sub>31</sub> H <sub>38</sub> O <sub>17</sub>  | [M-H] <sup>-</sup>  | 681.2054          | 681.2036            | 2.64           | Tenuifoliside A                                              | RP                  |
| 14 | 29.324                  | C <sub>34</sub> H <sub>42</sub> O <sub>18</sub>  | [M-H] <sup>-</sup>  | 737.232           | 737.2298            | 2.98           | Sucrose 18                                                   | RP                  |
| 15 | 30.476                  | C <sub>35</sub> H <sub>44</sub> O <sub>19</sub>  | [M-H] <sup>-</sup>  | 767.2406          | 767.2404            | 0.26           | Tenuifoliside C                                              | RP                  |
| 16 | 31.545                  | C <sub>68</sub> H <sub>86</sub> O <sub>39</sub>  | [M-H] <sup>-</sup>  | 1525.473          | 1525.467            | 3.67           | Tenuifoliose F                                               | RP                  |
| 17 | 31.645                  | C <sub>67</sub> H <sub>84</sub> O <sub>38</sub>  | [M-H] <sup>-</sup>  | 1495.456          | 1495.457            | -0.47          | Tenuifoliose L                                               | RP                  |
| 18 | 32.747                  | C <sub>67</sub> H <sub>70</sub> O <sub>32</sub>  | [M-H] <sup>-</sup>  | 1265.382          | 1265.378            | 3              | Tenuifoliose K                                               | RP                  |
| 19 | 33.559                  | C <sub>58</sub> H <sub>72</sub> O <sub>33</sub>  | [M-H] <sup>-</sup>  | 1295.394          | 1295.388            | 4.71           | Tenuifoliose C                                               | RP                  |
| 20 | 33.683                  | C <sub>35</sub> H <sub>42</sub> O <sub>19</sub>  | [M-H] <sup>-</sup>  | 765.223           | 765.2248            | -2.35          | Sucrose 12                                                   | RP                  |
| 21 | 34.117                  | C <sub>59</sub> H <sub>74</sub> O <sub>34</sub>  | [M-H] <sup>-</sup>  | 1325.405          | 1325.399            | 4.83           | Tenuifoliose P                                               | RP                  |
| 22 | 34.561                  | C <sub>10</sub> H <sub>12</sub> O <sub>4</sub>   | [M+H] <sup>+</sup>  | 197.0817          | 197.0808            | 4.57           | Asaronaldehyde                                               | AT                  |
| 23 | 37.758                  | C <sub>53</sub> H <sub>84</sub> O <sub>24</sub>  | [M-H] <sup>-</sup>  | 1103.525          | 1103.528            | -2.81          | Polygalasaponin XXVIII                                       | RP                  |
| 24 | 39.244                  | C <sub>61</sub> H <sub>76</sub> O <sub>35</sub>  | [M-H] <sup>-</sup>  | 1367.414          | 1367.409            | 3.07           | Tenuifoliose O                                               | RP                  |
| 25 | 39.651                  | C <sub>61</sub> H <sub>74</sub> O <sub>34</sub>  | [M-H] <sup>-</sup>  | 1349.395          | 1349.399            | -2.59          | Tenuifoliose H                                               | RP                  |
| 26 | 40.697                  | C <sub>69</sub> H <sub>102</sub> O <sub>30</sub> | [M-H] <sup>-</sup>  | 1409.414          | 1409.411            | 2.34           | Onjisaponin Y                                                | RP                  |
| 27 | 43.055                  | C <sub>59</sub> H <sub>72</sub> O <sub>33</sub>  | [M-H] <sup>-</sup>  | 1307.382          | 1307.388            | -4.82          | Tenuifoliose I                                               | RP                  |
| 28 | 43.456                  | C <sub>60</sub> H <sub>74</sub> O <sub>34</sub>  | [M-H] <sup>-</sup>  | 1337.394          | 1337.399            | -3.81          | Tenuifoliose B                                               | RP                  |
| 29 | 44.873                  | C <sub>76</sub> H <sub>114</sub> O <sub>37</sub> | [M-H] <sup>-</sup>  | 1617.693          | 1617.697            | -2.04          | Onjisaponin R                                                | RP                  |
| 30 | 45.508                  | C <sub>77</sub> H <sub>116</sub> O <sub>37</sub> | [M-H] <sup>-</sup>  | 1631.715          | 1631.712            | 1.72           | Onjisaponin O                                                | RP                  |
| 31 | 45.608                  | C <sub>75</sub> H <sub>112</sub> O <sub>35</sub> | [M-H] <sup>-</sup>  | 1571.687          | 1571.691            | -2.8           | Onjisaponin B                                                | RP                  |
| 32 | 45.741                  | C <sub>79</sub> H <sub>118</sub> O <sub>38</sub> | [M-H] <sup>-</sup>  | 1673.733          | 1673.723            | 6.27           | Tenuifolioside A                                             | RP                  |
| 33 | 45.908                  | C <sub>71</sub> H <sub>106</sub> O <sub>33</sub> | [M-H] <sup>-</sup>  | 1485.659          | 1485.654            | 2.83           | Onjisaponin E                                                | RP                  |
| 34 | 46.142                  | C <sub>75</sub> H <sub>112</sub> O <sub>36</sub> | [M-H] <sup>-</sup>  | 1587.695          | 1587.695            | -0.25          | Onjisaponin F                                                | RP                  |
| 35 | 50.368                  | C <sub>30</sub> H <sub>44</sub> O <sub>5</sub>   | [M-H] <sup>-</sup>  | 483.3106          | 483.3116            | -2.07          | Poricoic acid B                                              | PRP                 |
| 36 | 50.936                  | C <sub>31</sub> H <sub>46</sub> O <sub>5</sub>   | [M-H] <sup>-</sup>  | 497.3296          | 497.3272            | 4.83           | Poricoic acid A                                              | PRP                 |
| 37 | 51.065                  | C <sub>30</sub> H <sub>46</sub> O <sub>5</sub>   | [M-H] <sup>-</sup>  | 485.3248          | 485.3272            | -4.94          | Poricoic acid G                                              | PRP                 |
| 38 | 51.394                  | C <sub>12</sub> H <sub>16</sub> O <sub>3</sub>   | [M+H] <sup>+</sup>  | 209.1177          | 209.1172            | 2.39           | α-Asarone                                                    | AT                  |
| 39 | 51.482                  | C <sub>30</sub> H <sub>46</sub> O <sub>4</sub>   | [M-H] <sup>-</sup>  | 469.3284          | 469.3284            | 0              | 3β, 16α-Dihydroxy-lanosta-7, 9<br>(11), 24-trien-21-oic acid | PRP                 |
| 40 | 53.217                  | C <sub>32</sub> H <sub>50</sub> O <sub>5</sub>   | [M-H] <sup>-</sup>  | 513.3574          | 513.3585            | -2.14          | 3-O-acetyl-16α-<br>hydroxytrametenolic acid                  | PRP                 |
| 41 | 53.975                  | C <sub>33</sub> H <sub>52</sub> O <sub>5</sub>   | [M-H] <sup>-</sup>  | 527.3712          | 527.3742            | -5.69          | Pachymic acid                                                | PRP                 |
| 42 | 54.938                  | C <sub>24</sub> H <sub>32</sub> O <sub>6</sub>   | [M+Na] <sup>+</sup> | 439.2114          | 439.2041            | -6.14          | Diasarone I                                                  | AT                  |
| 43 | 56.314                  | C <sub>30</sub> H <sub>46</sub> O <sub>3</sub>   | [M-H] <sup>-</sup>  | 453.3375          | 453.3374            | 0.22           | Dehydrotrametenolic acid                                     | PRP                 |
| 44 | 56.409                  | C <sub>36</sub> H <sub>48</sub> O <sub>9</sub>   | [M+Na] <sup>+</sup> | 647.3214          | 647.3191            | 3.55           | Tatarinan A                                                  | AT                  |
| 45 | 57.115                  | C <sub>30</sub> H <sub>48</sub> O <sub>3</sub>   | [M-H] <sup>-</sup>  | 455.3555          | 455.3531            | 5.27           | Trametenolic acid                                            | PRP                 |

<sup>a</sup>RP = Radix Polygalae; AT = Rhizoma Acori Tatarinowii; PRP = Poria cum Radix Pini.
