# Supplementary material for: Smart Soup, a Traditional Chinese Medicine Formula, Ameliorates Amyloid Pathology and Related Cognitive Deficits
Source: PubMed Central journal article supplement (PMC4227681; doi:10.1371/journal.pone.0111215), 2014-11-11
Supplement: pone.0111215.s012.pdf [file pone.0111215.s012.pdf]

**Table S3. The detailed information of each mouse in each group.**

| Group                  | Before drug           |            | Age when MWM |       |        | After MWM  | Age when Perfusion |       |        | Perfusion  |
|------------------------|-----------------------|------------|--------------|-------|--------|------------|--------------------|-------|--------|------------|
|                        | Birthday              | Weight (g) | Days         | Weeks | Months | Weight (g) | Days               | Weeks | Months | Weight (g) |
| WT<br>Veh              | 2010-9-15             | 30.4       | 288          | 41.1  | 9.3    | 30.2       | 447                | 63.9  | 14.4   | 30.8       |
|                        | 2010-10-1             | 27.9       | 272          | 38.9  | 8.8    | 28.1       | 431                | 61.6  | 13.9   | 27.9       |
|                        | 2010-9-15             | 26.2       | 288          | 41.1  | 9.3    | 26.2       | 447                | 63.9  | 14.4   | 26.3       |
|                        | 2010-9-15             | 27.6       | 288          | 41.1  | 9.3    | 27.8       | 447                | 63.9  | 14.4   | 27.8       |
|                        | 2010-9-15             | 22.4       | 288          | 41.1  | 9.3    | 22.2       | 447                | 63.9  | 14.4   | 20.9       |
|                        | 2010-9-26             | 26.2       | 277          | 39.6  | 8.9    | 26.8       | 436                | 62.3  | 14.1   | 27.1       |
|                        | 2010-9-13             | 24.6       | 290          | 41.4  | 9.4    | 24.1       | 449                | 64.1  | 14.5   | 24.4       |
|                        | 2010-9-13             | 24.0       | 290          | 41.4  | 9.4    | 24.0       | 449                | 64.1  | 14.5   | 24.3       |
|                        | 2010-9-26             | 27.3       | 277          | 39.6  | 8.9    | 27.5       | 436                | 62.3  | 14.1   | 27.1       |
|                        | 2010-9-26             | 26.1       | 277          | 39.6  | 8.9    | 26.3       | 436                | 62.3  | 14.1   | 28.0       |
| 2010-9-15              | 28.0                  | 288        | 41.1         | 9.3   | 27.6   | 447        | 63.9               | 14.4  | 28.6   |            |
| Average of WT Veh      |                       | 26.4       | 284          | 40.6  | 9.2    | 26.4       | 443                | 63.3  | 14.3   | 26.7       |
| WT<br>SS               | 2010-10-1             | 27.3       | 272          | 38.9  | 8.8    | 27.2       | 431                | 61.6  | 13.9   | 27.5       |
|                        | 2010-9-15             | 28.1       | 288          | 41.1  | 9.3    | 27.6       | 447                | 63.9  | 14.4   | 28.3       |
|                        | 2010-9-13             | 25.9       | 290          | 41.4  | 9.4    | 26.1       | 449                | 64.1  | 14.5   | 26.0       |
|                        | 2010-9-15             | 30.3       | 288          | 41.1  | 9.3    | 29.7       | 447                | 63.9  | 14.4   | 31.9       |
|                        | 2010-9-15             | 26.1       | 288          | 41.1  | 9.3    | 26.3       | 447                | 63.9  | 14.4   | 26.9       |
|                        | 2010-9-15             | 23.9       | 288          | 41.1  | 9.3    | 24.2       | 447                | 63.9  | 14.4   | 25.5       |
|                        | 2010-9-26             | 22.2       | 277          | 39.6  | 8.9    | 21.9       | 436                | 62.3  | 14.1   | 21.7       |
|                        | 2010-9-26             | 24.9       | 277          | 39.6  | 8.9    | 24.8       | 436                | 62.3  | 14.1   | 25.0       |
|                        | 2010-9-15             | 29.0       | 288          | 41.1  | 9.3    | 28.5       | 447                | 63.9  | 14.4   | 30.3       |
|                        | 2010-9-15             | 30.6       | 288          | 41.1  | 9.3    | 31.8       | 447                | 63.9  | 14.4   | 32.7       |
| Average of WT SS       |                       | 26.8       | 284          | 40.6  | 9.2    | 26.8       | 443                | 63.3  | 14.3   | 27.6       |
| APP/PS1<br>Veh         | 2010-9-15             | 28.1       | 288          | 41.1  | 9.3    | 27.4       | 447                | 63.9  | 14.4   | 29.8       |
|                        | 2010-10-1             | 24.3       | 272          | 38.9  | 8.8    | 24.5       | 431                | 61.6  | 13.9   | 24.2       |
|                        | 2010-10-1             | 26.6       | 272          | 38.9  | 8.8    | 26.8       | 431                | 61.6  | 13.9   | 27.2       |
|                        | 2010-9-15             | 26.2       | 288          | 41.1  | 9.3    | 26.4       | 447                | 63.9  | 14.4   | 26.4       |
|                        | 2010-9-15             | 31.2       | 288          | 41.1  | 9.3    | 30.8       | 447                | 63.9  | 14.4   | 33.0       |
|                        | 2010-9-13             | 27.5       | 290          | 41.4  | 9.4    | 27.9       | 449                | 64.1  | 14.5   | 28.3       |
|                        | 2010-9-15             | 27.5       | 288          | 41.1  | 9.3    | 27.9       | 447                | 63.9  | 14.4   | 26.4       |
|                        | 2010-9-15             | 29.6       | 288          | 41.1  | 9.3    | 30.1       | 447                | 63.9  | 14.4   | 29.8       |
|                        | 2010-9-15             | 26.8       | 288          | 41.1  | 9.3    | 27.3       | 447                | 63.9  | 14.4   | 26.9       |
|                        | 2010-9-26             | 26.1       | 277          | 39.6  | 8.9    | 26.0       | 436                | 62.3  | 14.1   | 26.2       |
| Average of APP/PS1 Veh |                       | 27.4       | 284          | 40.6  | 9.2    | 27.5       | 443                | 63.3  | 14.3   | 27.8       |
| APP/PS1<br>SS          | 2010-9-15             | 30.3       | 288          | 41.1  | 9.3    | 30.4       | 447                | 63.9  | 14.4   | 30.6       |
|                        | 2010-10-1             | 25.9       | 272          | 38.9  | 8.8    | 26.1       | 431                | 61.6  | 13.9   | 25.8       |
|                        | 2010-10-1             | 29.1       | 272          | 38.9  | 8.8    | 28.9       | 431                | 61.6  | 13.9   | 29.1       |
|                        | 2010-10-1             | 22.5       | 272          | 38.9  | 8.8    | 22.8       | 431                | 61.6  | 13.9   | 22.9       |
|                        | 2010-9-13             | 30.2       | 290          | 41.4  | 9.4    | 30.8       | 449                | 64.1  | 14.5   | 30.5       |
|                        | 2010-9-13             | 25.9       | 290          | 41.4  | 9.4    | 26.7       | 449                | 64.1  | 14.5   | 26.2       |
|                        | 2010-9-15             | 25.2       | 288          | 41.1  | 9.3    | 25.4       | 447                | 63.9  | 14.4   | 25.9       |
|                        | 2010-9-15             | 28.0       | 288          | 41.1  | 9.3    | 28.1       | 447                | 63.9  | 14.4   | 28.2       |
|                        | 2010-9-29             | 27.4       | 274          | 39.1  | 8.8    | 27.7       | 433                | 61.9  | 14.0   | 27.5       |
|                        | Average of APP/PS1 SS |            | 27.2         | 282   | 40.2   | 9.1        | 27.4               | 441   | 62.9   | 14.2       |
